# Supplementary material for: Organic sulphonate salts tethered to mesoporous silicas as catalysts for CO2 fixation into cyclic carbonates
Source: Royal Society of Chemistry journal article supplement (doi:10.1039/c4cy01321b), 2014-11-27
Supplement: c4cy01321b1.pdf [file c4cy01321b1.pdf]

## Supporting information

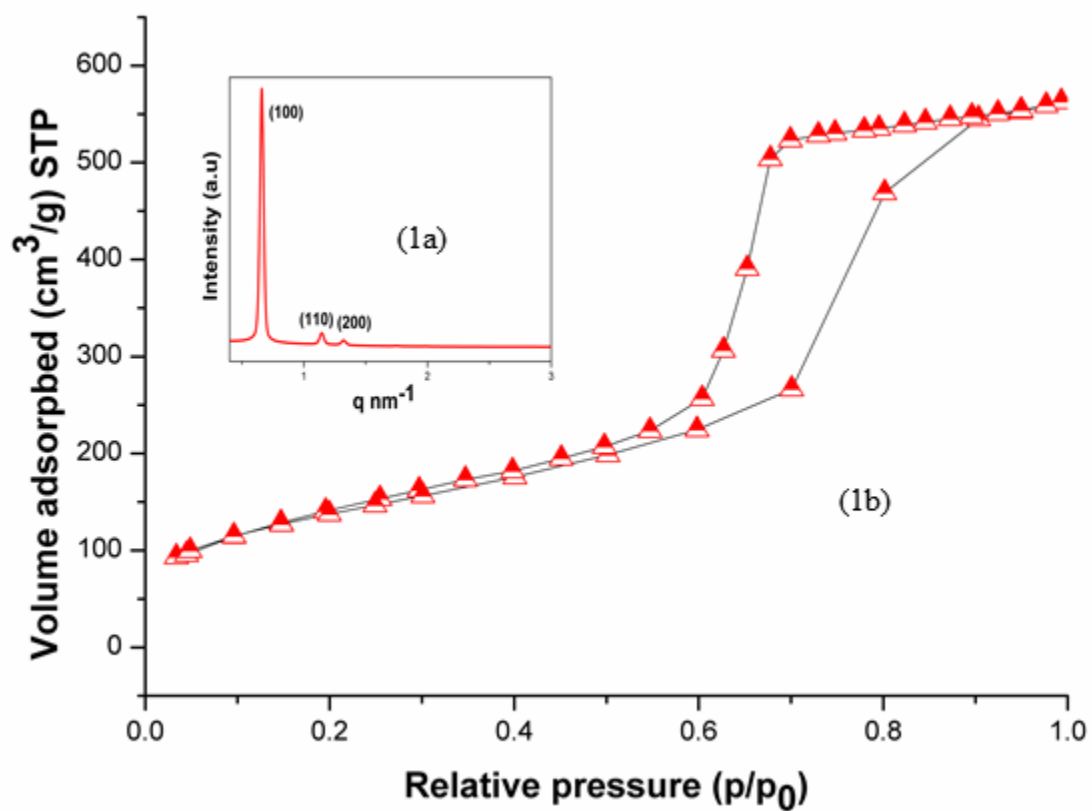

Fig. S1 SAXS (1a) and N<sub>2</sub> physisorption curve (1b) of SBA-15

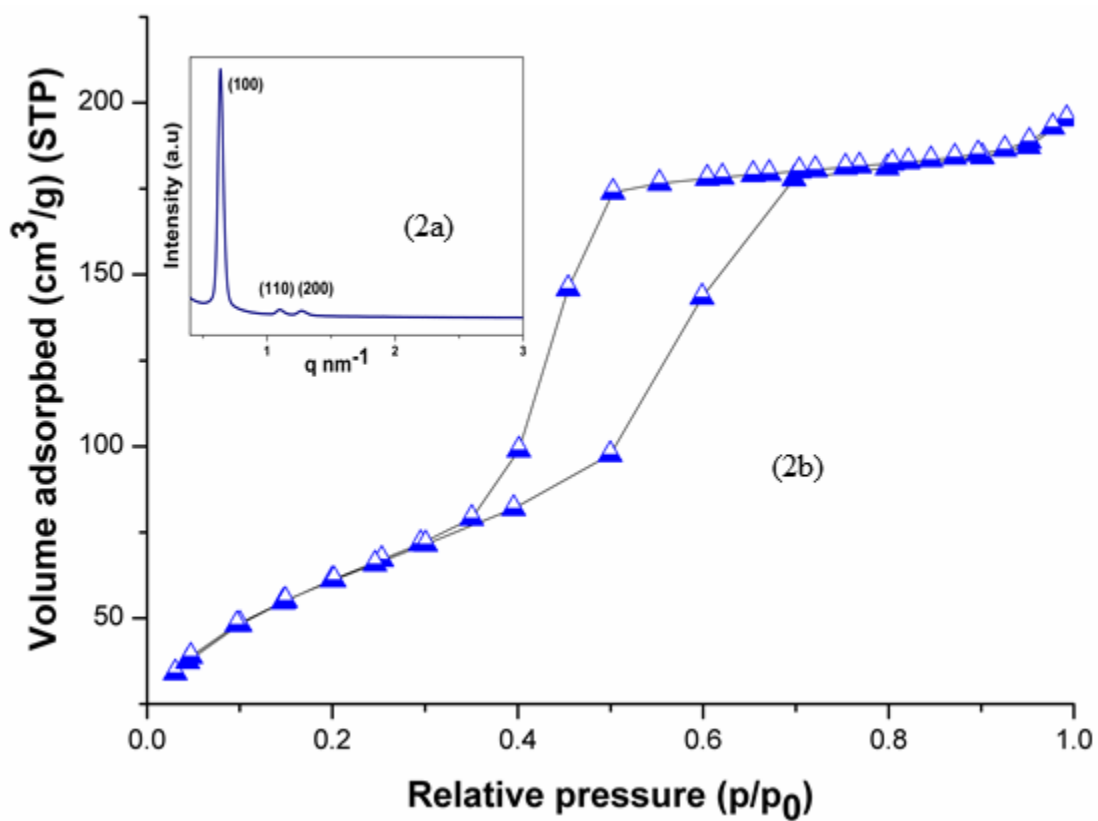

**Fig. S2** SAXS (2a) and N<sub>2</sub> physisorption curve (2b) of propyl thiol functionalized SBA-15

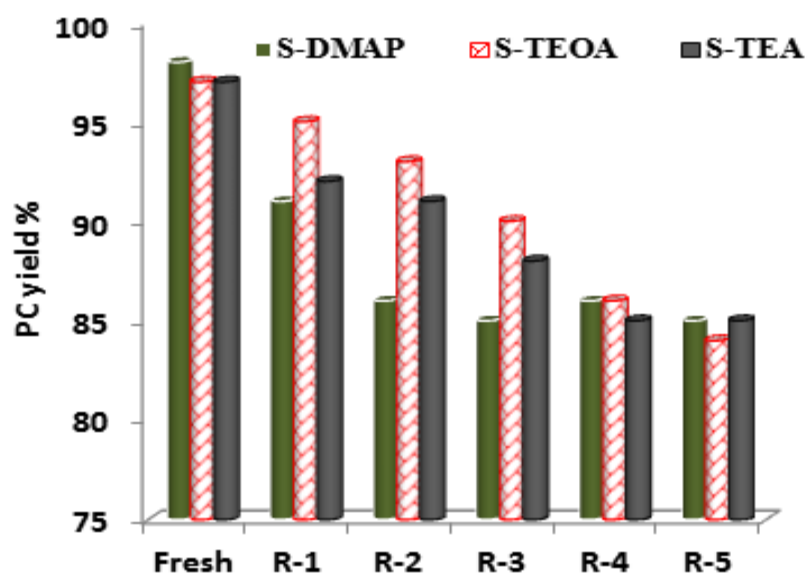

**Fig. S3** The reusability of S-base catalysts (without regeneration with the corresponding organic bases).

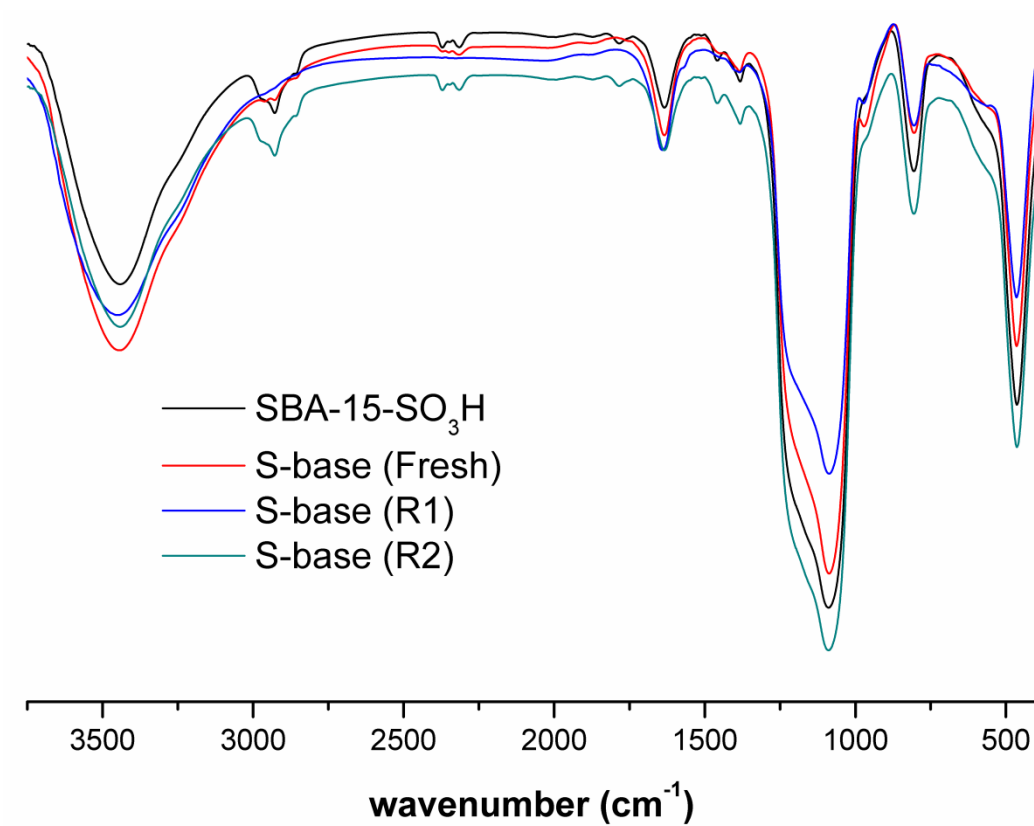

**Fig. S4** FT-IR spectrum of recycled S-Base catalysts with fresh catalysts and SBA-15-SO<sub>3</sub>H.

**Table S1**

Elemental analysis of organic sulphonate salt tethered SBA-15 mesoporous silica

|        | C %  | H%   | N%   | S%   |
|--------|------|------|------|------|
| S-DMAP | 3.97 | 1.23 | 0.29 | 0.60 |
| S-TEOA | 4.40 | 1.36 | 0.27 | 0.61 |
| S-TEA  | 3.87 | 1.2  | 0.26 | 0.62 |

**Table S2**

Comparative study of the propylene carbonate synthesis using supported mesoporous silica materials

| Entry | Catalyst                                       | Temp. | Press. | Time | Yield | selec. | TOF | Ref  |                           |
|-------|------------------------------------------------|-------|--------|------|-------|--------|-----|------|---------------------------|
|       | (mol%)                                         | (° C) | (MPa)  | (h)  | (%)   | (%)    |     |      |                           |
| 1     | Silicagel/nBu <sub>4</sub> NBr                 | 1     | 150    | 8    | 10    | 97     | 98  | 9    | 10a                       |
| 2     | Silica gel/[C4-IM] <sup>+</sup> X <sup>-</sup> | 1.8   | 160    | 8    | 4     | 96     | 99  | 13   | 10b                       |
| 3     | Silica gel(GIL-3)                              | 1.8   | 120    | 2    | 4     | 95     | 100 | 13   | 10c                       |
| 4     | SBA-15-IL1Br                                   | 0.78  | 110    | 2    | 2     | 85     | 99  | 53.9 | 5m                        |
| 5     | SBA-15-IL2Br                                   | 0.33  | 110    | 2    | 2     | 69     | 98  | 104  | 5m                        |
| 6     | Silica IL/ZnCl <sub>2</sub>                    | 0.03  | 110    | 1.0  | 1     | 60     | 99  | 1713 | 10d                       |
| 7     | CILBr-Si                                       | 2.2   | 110    | 1.62 | 3     | 99     | 99  | 73   | 5n                        |
| 8     | <sup>a</sup> Silica S-DMAP/KI                  | 0.02  | 110    | 1.1  | 4     | 98     | 99  | 1048 | <a href="#">This work</a> |
| 9     | <sup>b</sup> Silica S-DMAP/KI                  | 0.01  | 110    | 1.1  | 4     | 85     | 99  | 1947 | <a href="#">This work</a> |

<sup>a</sup> Reaction conditions: PO -20 mmol, S-DMAP- 0.02 mol%, KI-0.4 mol%, 110 °C, 1.1 MPa, 4h.

<sup>b</sup> PO=42.8 mmol, S-DMAP-0.01 mol%, KI-0.2 mol% .

**Table S3** N<sub>2</sub>-physisorption studies of sulphonic /sulphonate catalysts

| material                     | S <sub>BET</sub><br>(m <sup>2</sup> /g) | Pore size<br>(nm) | Pore volume<br>(cm <sup>3</sup> /g) |
|------------------------------|-----------------------------------------|-------------------|-------------------------------------|
| SBA-15                       | 488                                     | 6.2               | 0.91                                |
| SBA-15-SH                    | 390                                     | 5.71              | 0.71                                |
| SBA-15-SO <sub>3</sub> H     | 380                                     | 5.72              | 0.68                                |
| S-DMAP                       | 386                                     | 5.77              | 0.68                                |
| S-DMAP(R3)                   | 372                                     | 5.68              | 0.65                                |
| SBA-15-SO <sub>3</sub> H(R4) | 360                                     | 5.67              | 0.59                                |
